# Supplementary material
Source: PubMed Central journal article supplement (PMC5937119)
Supplement: NIHMS961093-supplement-Supplemental_Information.pdf [file NIHMS961093-supplement-Supplemental_Information.pdf]

## **Supporting Information Cathepsin-Mediated Cleavage of Peptides from Peptide Amphiphiles Leads to Enhanced Intracellular Peptide Accumulation**

Handan Acar, PhD<sup>†,‡</sup>, Ravand Samaeekia, MS<sup>†,‡</sup>, Mathew R. Schnorenberg<sup>†,‡,§</sup>, Dibyendu Kumar Sasmal, PhD<sup>†</sup>, Jun Huang, PhD<sup>†</sup>, Matthew V. Tirrell, PhD<sup>†,||,\*</sup>, James L. LaBelle, MD, PhD<sup>†,\*</sup>

<sup>†</sup>Institute for Molecular Engineering, University of Chicago, Eckardt Research Center, 5640 South Ellis Avenue, Chicago, IL, 60637, USA

<sup>‡</sup>Department of Pediatrics, Section of Hematology/Oncology, University of Chicago, 900 East 57<sup>th</sup> Street, KCBD 5122, Chicago, IL, 60637, USA

<sup>§</sup>Medical Scientist Training Program, University of Chicago, 924 East 57<sup>th</sup> Street, Suite 104, Chicago, IL, 60637, USA

<sup>||</sup> Institute for Molecular Engineering, Argonne National Laboratory, 9700 South Cass Avenue Argonne, IL 60639, USA

### \*Corresponding Authors:

James L. LaBelle

900 East 57<sup>th</sup> Street, KCBD 5122, Chicago, IL 60637

Email: [jlabelle@peds.bsd.uchicago.edu](mailto:jlabelle@peds.bsd.uchicago.edu)

Phone: 773-702-6812

Fax: 773-834-1329

Matthew V. Tirrell

Institute for Molecular Engineering

5640 South Ellis Avenue

Chicago, IL 60637

Email: [mtirrell@uchicago.edu](mailto:mtirrell@uchicago.edu)

Phone: 773-834-2001

Fax: 773-834-7756

Figure S1: Chemical structure of the enzyme cleavable sequences and enzymatic analysis.

Figure S2: Length between FAM and Tamra FRET fluorophores on VC-PABA-p53<sub>(14-29)</sub> and GGG-p53<sub>(14-29)</sub>.

Figure S3: Wide field microscope setup used to measure FRET signal.

Figure S4: Relative intensity of cleaved Tamra and FAM following the addition of recombinant catB.

Figure S5: LC/MS of diC<sub>16</sub>-VC-PABA- p53<sub>(14-29)</sub>.

Figure S6: LC/MS of diC<sub>16</sub>-GGG- p53<sub>(14-29)</sub>.

Figure S7: Dynamic light scattering and critical micellar concentration of diC<sub>16</sub>-VC-PABA-p53<sub>(14-29)</sub> and diC<sub>16</sub>-GGG-p53<sub>(14-29)</sub> .

Figure S8: HPLC analysis following recombinant catB treatment of diC<sub>16</sub>-GGG-p53<sub>(14-29)</sub> and diC<sub>16</sub>-VC-PABA-p53<sub>(14-29)</sub>.

## SUPPORTING FIGURES

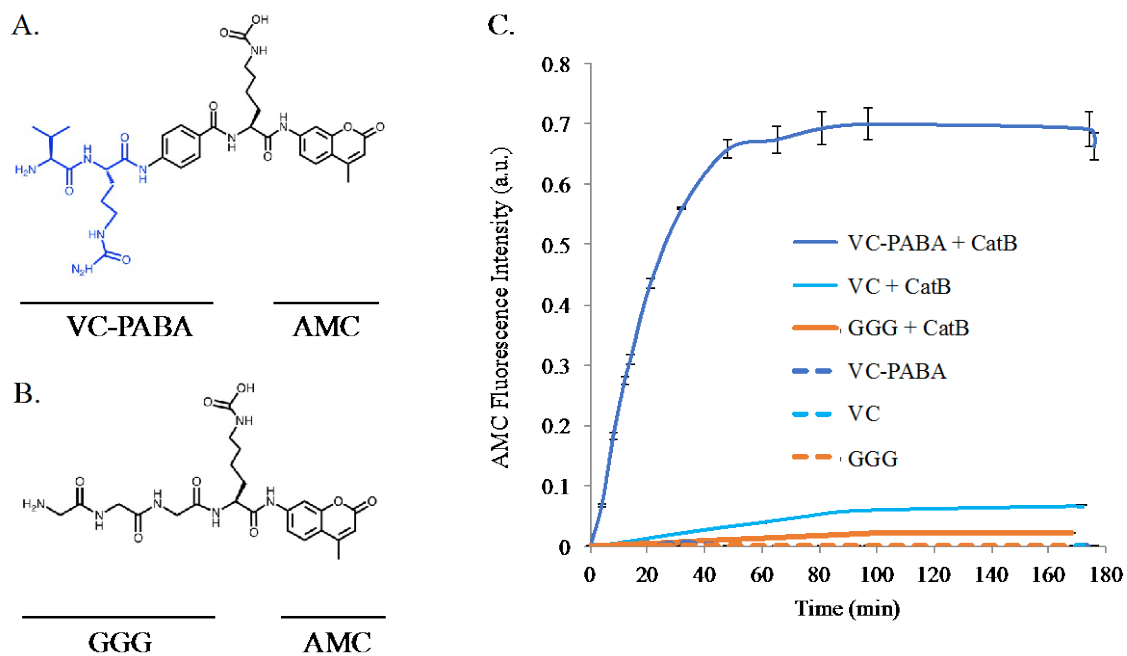

**Figure S1.** Chemical structure of the enzyme cleavable sequence, (A) Valine-Citrulline-Para(aminobenzoic acid) (VC-PABA)-AMC; (B) Control, non-cleavable sequence, Glycine-Glycine-Glycine (GGG)-AMC; (C) AMC fluorescence intensity change over time following addition of recombinant human cathepsin-B (catB) or PBS control.

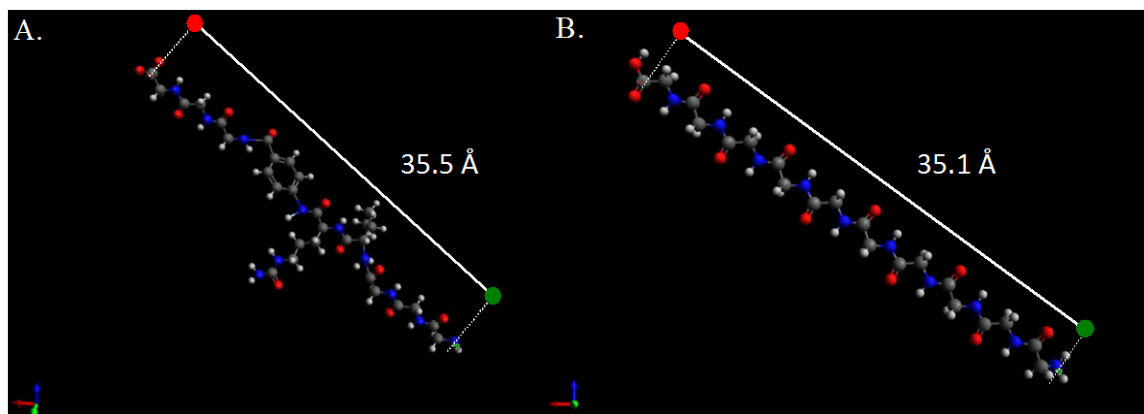

**Figure S2.** The length between FAM and Tamra FRET fluorophores on the amino acid linkers between (A) VC-PABA-p53<sub>(14-29)</sub>: 35.5 Å, and (B) GGG-p53<sub>(14-29)</sub>: 35.1 Å .

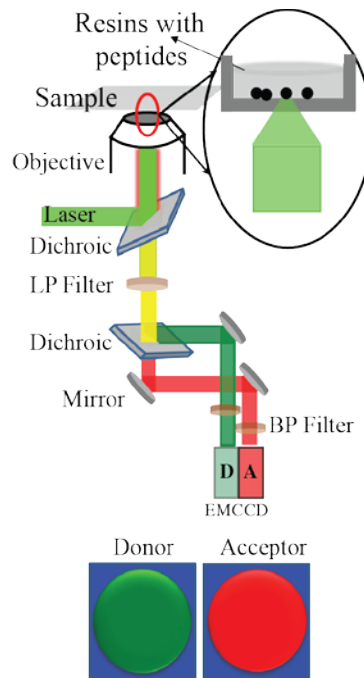

**Figure S3.** Wide field microscope setup used to measure FRET signal of a small number of peptide targets immobilized on the microscope viewing chamber as depicted in Figure 2.

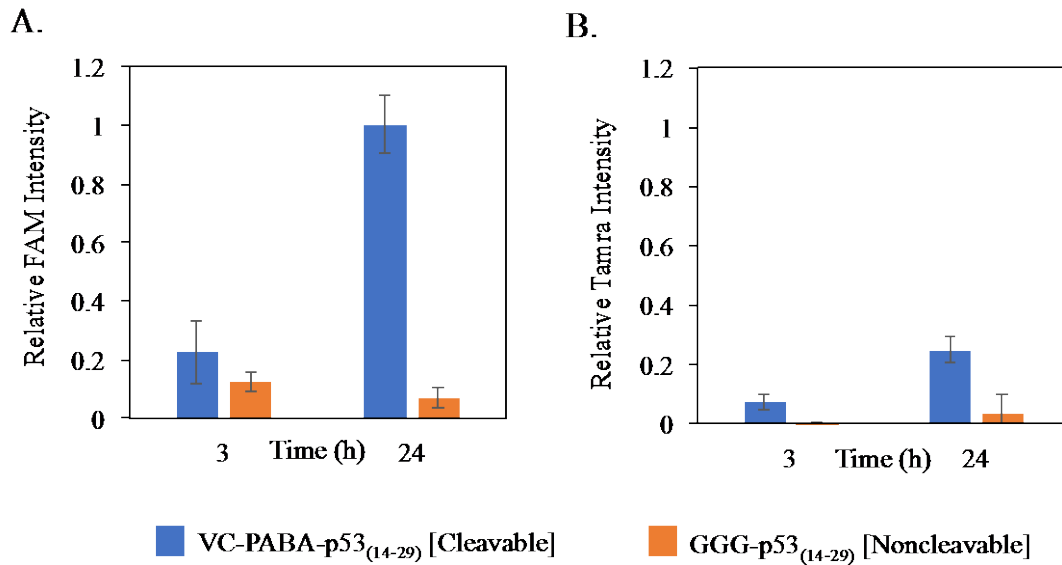

**Figure S4.** Relative intensity of cleaved (A) FAM and (B) Tamra following the addition of recombinant catB as depicted in Figures 2 and S3. The fluorescence intensity of Tamra remained low even after 24 hours while that of FAM increased over time only in VC-PABA- p53<sub>(14-29)</sub> samples indicating enzymatic cleavage reliant on VC-PABA and resistance of p53<sub>(14-29)</sub> to enzymatic degradation.

A.

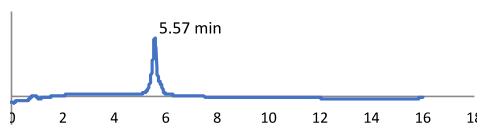

B.

C.

D.

E.

min

**Figure S5.** LC/MS of diC<sub>16</sub>-VC-PABA- p53<sub>(14-29)</sub> shows uniform elution peaks with UV absorbance to detect peptide bonds at 220nm (A), phenylalanine at 280nm (B), FAM at 490nm (C), and Tamra at 565nm (D). Electrospray ionization (ESI) mass spectrum of these peaks confirmed a predicted molecular weight of 4409 g/mol (E).

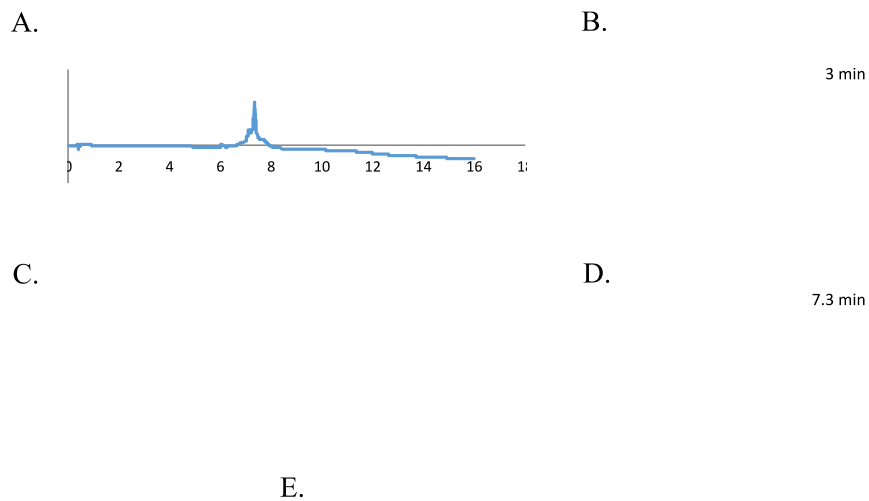

**Figure S6.** LC/MS of diC<sub>16</sub>-GGG- p53<sub>(14-29)</sub> shows uniform elution peaks with UV absorbance to detect peptide bonds at 220nm (A), phenylalanine at 280nm (B), FAM at 490nm (C), and Tamra at 565nm (D). Electrospray ionization (ESI) mass spectrum of these peaks confirmed a predicted molecular weight of 4249 g/mol (E).



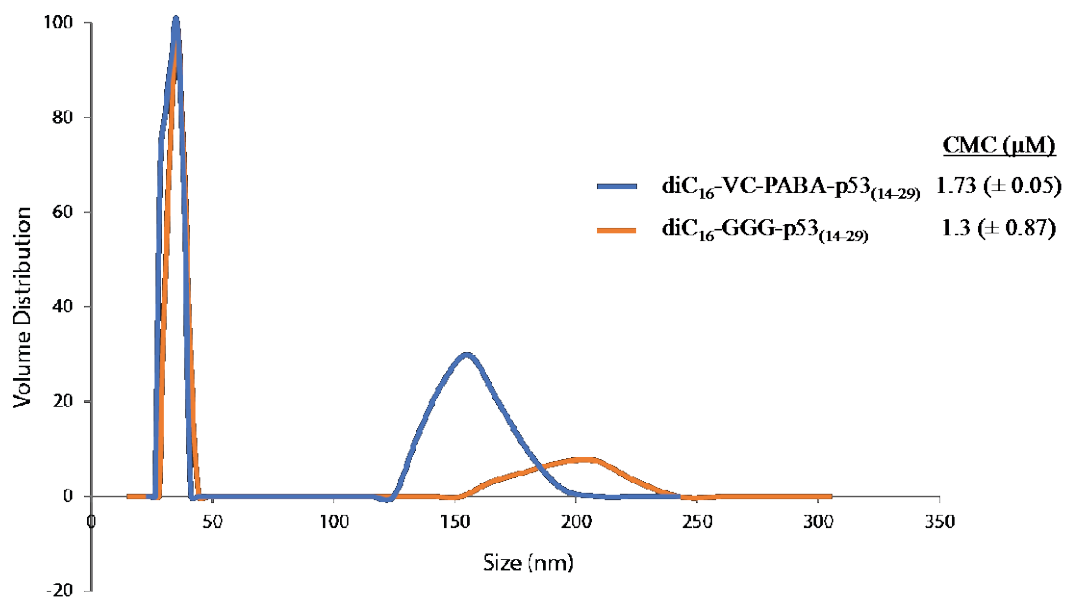

**Figure S7.** Dynamic light scattering (DLS) of diC<sub>16</sub>-VC-PABA-p53<sub>(14-29)</sub> (blue) and diC<sub>16</sub>-GGG-p53<sub>(14-29)</sub> (orange) PAs indicate predominant scattering of micelles between 10-40 nm. A second scattering at 150 nm (diC<sub>16</sub>-VC-PABA-p53<sub>(14-29)</sub>) and 200 nm (diC<sub>16</sub>-GGG-p53<sub>(14-29)</sub>) is likely secondary to PA aggregation secondary to the FAM and Tamra hydrophobic dyes. Critical micelle concentration (CMC) for PA micelles are similar.

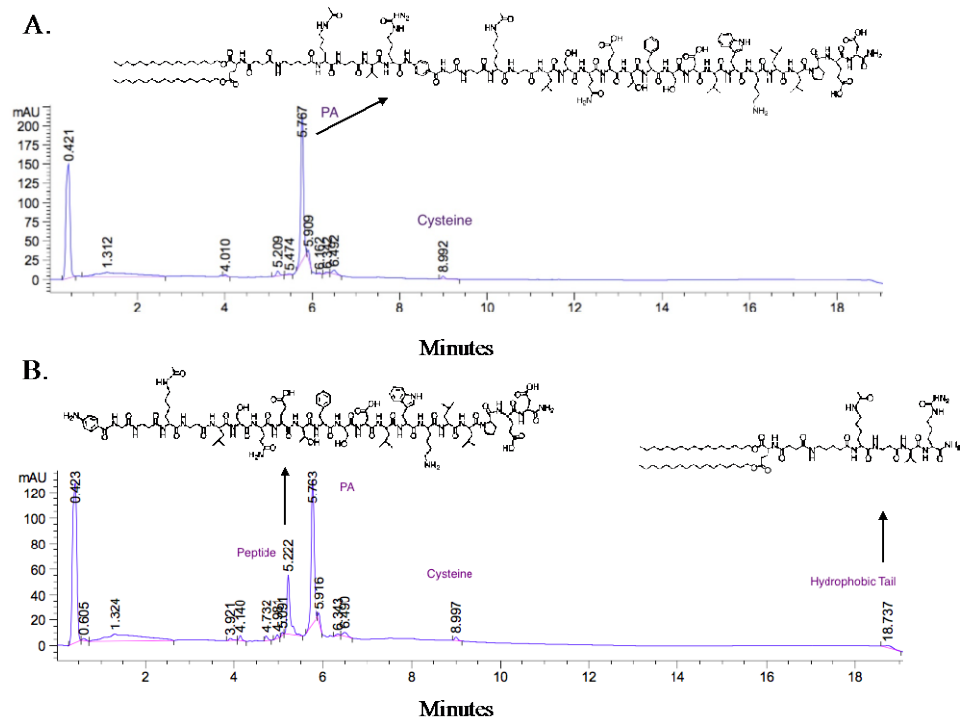

**Figure S8.** HPLC analysis following recombinant catB enzyme incubation with (A) diC<sub>16</sub>-GGG-p53<sub>(14-29)</sub> and (B) diC<sub>16</sub>-VC-PABA-p53<sub>(14-29)</sub> indicate cleavage of p53<sub>(14-29)</sub> from diC<sub>16</sub> only from diC<sub>16</sub>-VC-PABA-p53<sub>(14-29)</sub>.
